# Supplementary material for: Bioconversion of oxygen-pretreated Kraft lignin to microbial lipid with oleaginous Rhodococcus opacus DSM 1069
Source: Royal Society of Chemistry journal article supplement (doi:10.1039/c5gc00422e), 2015-01-01
Supplement: c5gc00422e1.pdf [file c5gc00422e1.pdf]

**Electronic Supplementary Information (ESI) for:**

**Bioconversion of oxygen-pretreated Kraft lignin to microbial lipid**

**with oleaginous *Rhodococcus opacus* DSM 1069**

Zhen Wei<sup>a,b</sup>, Guangming Zeng<sup>a,b</sup>, Fang Huang<sup>c</sup>, Matyas Kosa<sup>c</sup>, Danlian Huang<sup>a,b</sup>,

Arthur J. Ragauskas<sup>c,d\*</sup>

<sup>a</sup> College of Environmental Science and Engineering, Hunan University, Changsha 410082, People's Republic of China

<sup>b</sup> Key Laboratory of Environment Biology and Pollution Control (Hunan University), Ministry of Education, Changsha 410082, People's Republic of China

<sup>c</sup> School of Chemistry and Biochemistry, Institute for Paper Science and Technology, Georgia Institute of Technology, Atlanta, GA 30332, USA

<sup>d</sup> Department of Chemical and Biomolecular Engineering, Department of Forestry, Wildlife, and Fisheries, The University of Tennessee-Knoxville, 1512 Middle Drive, Knoxville, TN 37996-2200, USA

**Corresponding authors:**

\*Arthur J. Ragauskas (**Will handle correspondence at all stages of refereeing and publication**)

Tel: +14048949701; Fax: +14048944778.

E-mail address: [aragausk@utk.edu](mailto:aragausk@utk.edu)

Address: Department of Chemical and Biomolecular Engineering, Department of Forestry, Wildlife, and Fisheries, The University of Tennessee-Knoxville, 1512 Middle Drive, Knoxville, TN 37996-2200, USA

\* Guangming Zeng

Tel.: +8673188822754; fax: +86073188823701.

E-mail address: [zgming@hnu.edu.cn](mailto:zgming@hnu.edu.cn);

Address: College of Environmental Science and Engineering, Hunan University, Changsha, Hunan 410082, China.

## Figure captions

**Fig. S1.** Comparing CFU results of the two fermentation system: Kraft lignin (the top line), O<sub>2</sub>-pretreated Kraft lignin (the bottom line), 0.1 ml samples were pipetted from fermentation systems and diluted, followed by incubation in nutrient medium. The dilution ratios of KL 0-7d and O<sub>2</sub>-KL 0d are 10<sup>2</sup>, O<sub>2</sub>-KL 1-7d are 10<sup>4</sup>.

**Fig. S2.** Gel permeation chromatograms (measured with UV detector) (above) and changes of the weight average molecular weight (bottom) of different lignin samples.

**Fig. S3.** Changes of hydroxyl group contents of different lignin samples, determined by quantitative <sup>31</sup>P NMR after derivatization with TMDP.

**Fig. S4.** Method of sample separation to obtain the residue lignin and cells.

**Table S1.** Cell specific, lipid specific yields and cell volumetric productivities of *R. opacus* DSM 1069 growing on untreated Kraft lignin.

**Fig. S1**

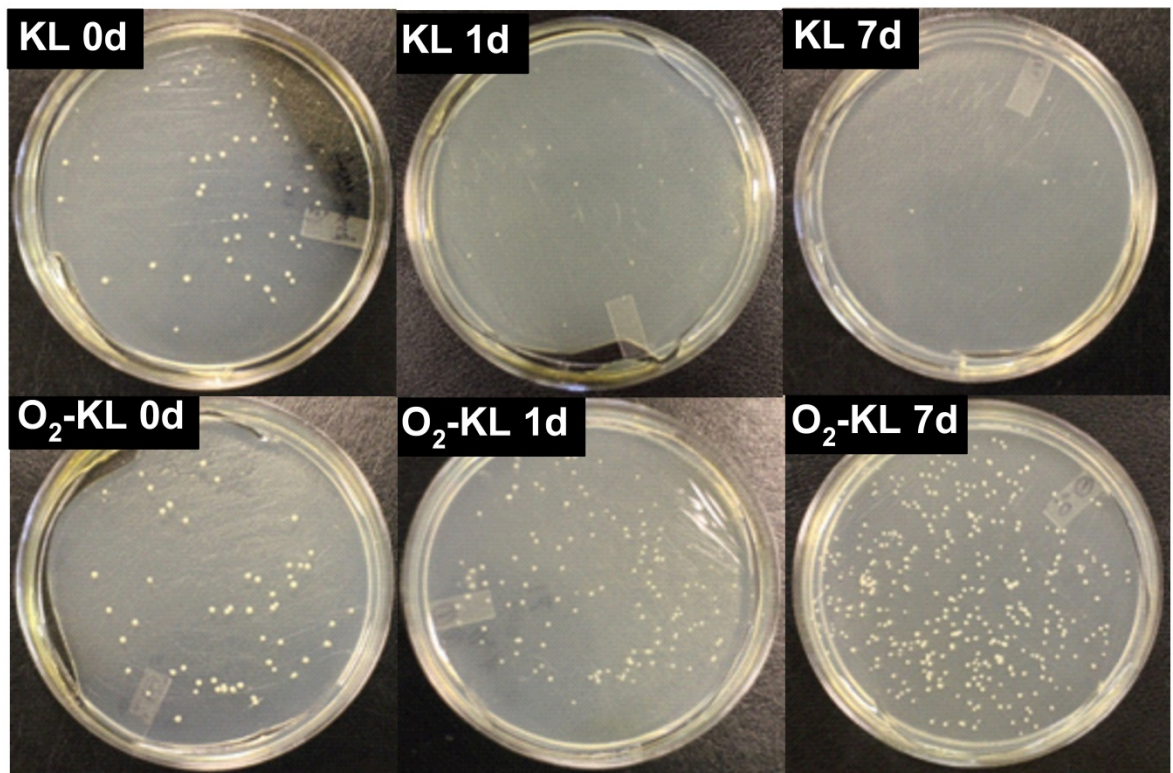

**Fig. S2**

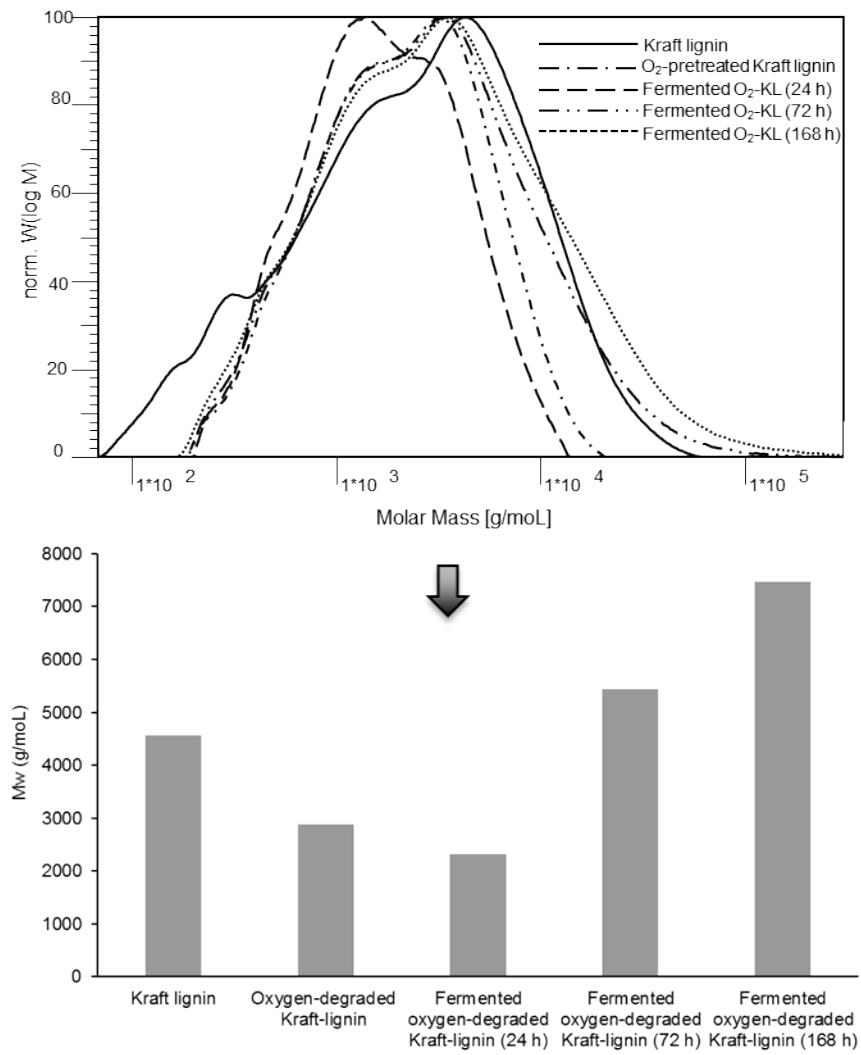

**Fig. S3**

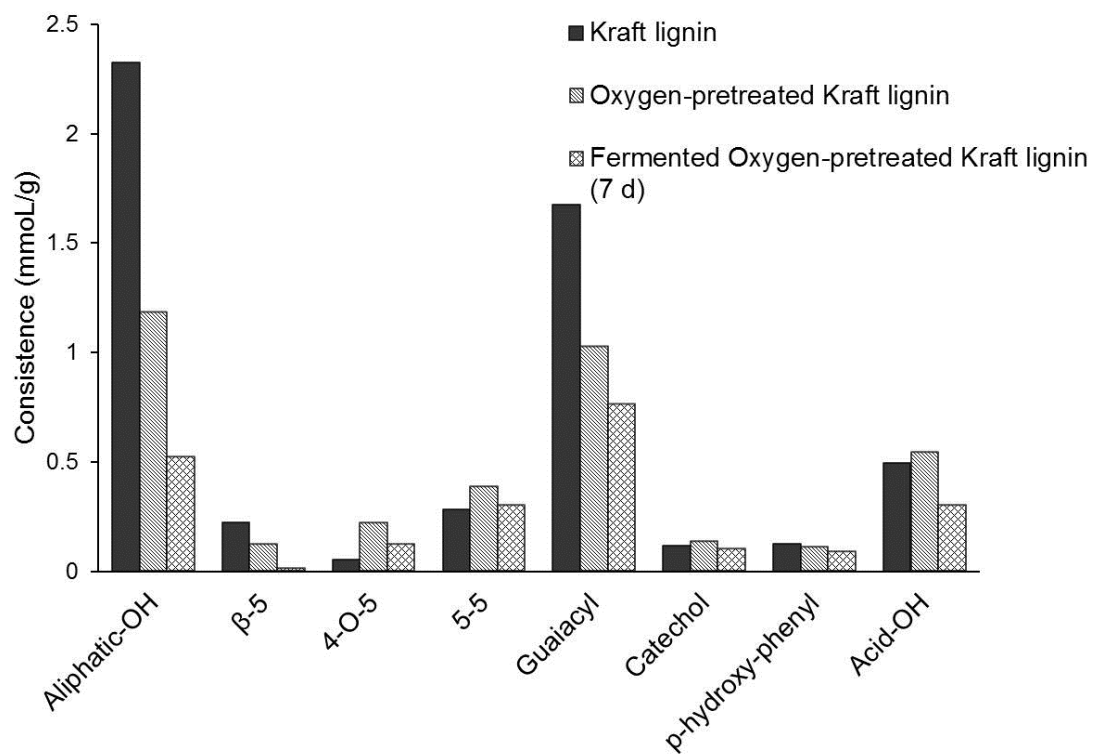

**Fig. S4**

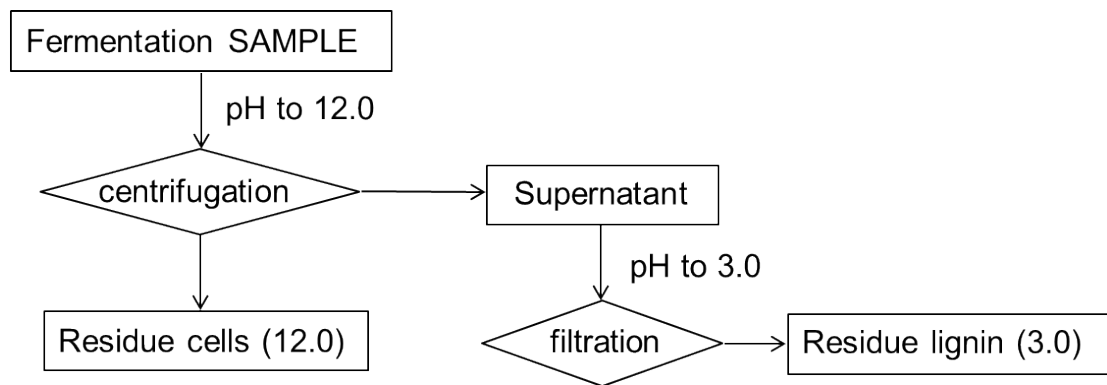

**Table S1** Cell specific, lipid specific yields and cell volumetric productivities of *R. opacus* DSM 1069 growing on untreated Kraft lignin.

| Productivities                    | Kraft lignin |       |      |       |
|-----------------------------------|--------------|-------|------|-------|
|                                   | 12 h         | 36 h  | 60 h | 120 h |
| $Y_{\text{cell}}$ [g/g KL]        | 0.102        | 0.081 | -    | -     |
| $Y_{\text{lipid}}$ [g/g KL]       | 0.005        | -     | -    | -     |
| $dc_{\text{cell}}/dt$ [mg/ml*day] | 0.122        | 0.032 | -    | -     |
